# Supplementary material for: Enhanced efficacy of photothermal therapy by combining a semiconducting polymer with an inhibitor of a heat shock protein
Source: Royal Society of Chemistry journal article supplement (doi:10.1039/c8qm00459e), 2018-11-20
Supplement: c8qm00459e1.pdf [file c8qm00459e1.pdf]

Electronic Supplementary Information

# Enhanced efficacy of photothermal therapy by combining semiconducting polymer with an inhibitor of heat shock protein

Tingting Sun,<sup>ab</sup> Xingxing Chen,<sup>ab</sup> Xin Wang,<sup>c</sup> Shi Liu,<sup>a</sup> Jun Liu<sup>a</sup> and Zhigang Xie<sup>\*a</sup>

<sup>a</sup> State Key Laboratory of Polymer Physics and Chemistry, Changchun Institute of Applied Chemistry, Chinese Academy of Sciences, 5625 Renmin Street, Changchun, Jilin 130022, P. R. China

<sup>b</sup> University of Chinese Academy of Sciences, Beijing 100049, P. R. China

<sup>c</sup> Department of Thyroid Surgery, The First Hospital of Jilin University, 71 Xinmin Street, Changchun, Jilin 130021, P. R. China

\*Corresponding author

E-mail address: [xiez@ciac.ac.cn](mailto:xiez@ciac.ac.cn)

**Characterization.**  $^1\text{H}$  NMR spectra were measured with Bruker Avance NMR spectrometer (400 MHz). Molecular weight of PDPP3T was measured by gel permeation chromatography (GPC) on a Waters 410 instrument with polystyrene as the standard and chloroform as the eluent. Elemental analysis was performed on a Bio-Rad elemental analyzer. The absorption and PL spectra were obtained from a UV-3600 UV-vis-NIR spectrophotometer (Shimadzu) and PerkinElmer LS-55 Spectrofluorophotometer respectively. DLS and TEM results of the nanoparticles were determined by Malvern Zeta-sizer Nano and JEOL JEM-1011 electron microscope (acceleration voltage of 100 kV). CLSM images were taken by using a Zeiss LSM 700 (Zurich, Switzerland). PA imaging was measured on MSOT inVision 128 small animal imaging system (iThera Medical GmbH).

**Synthesis of polymer PDPP3T.**  $^1\text{H}$  NMR (400 MHz,  $\text{CDCl}_3$ )  $\delta$  9.13-8.60 (br), 7.18-6.83 (br), 4.33-3.13 (br), 2.63-2.29 (br). Anal. Calcd. for  $\text{C}_{46}\text{H}_{66}\text{N}_2\text{O}_{14}\text{S}_3$ : C, 57.12; H, 6.88; N, 2.90; S, 9.95. Found: C, 56.27; H, 6.35; N, 2.77; S, 10.19.

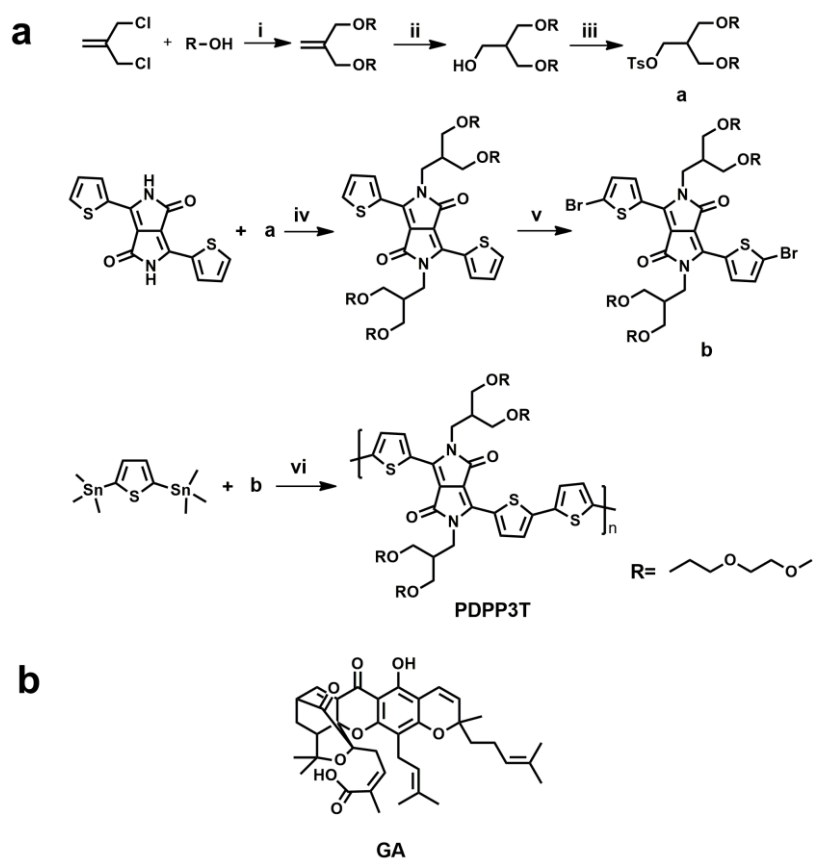

**Scheme S1** a) The synthetic routes of PDPPP3T. Reaction conditions: i) NaH in THF at 0 °C and then 65 °C; ii) BH<sub>3</sub>/THF at 0 °C then NaOH (aq), H<sub>2</sub>O<sub>2</sub> (aq) at r.t.; iii) (CH<sub>3</sub>)<sub>3</sub>N HCl, TsCl (4-Toluene sulfonyl chloride), Et<sub>3</sub>N in DCM, r.t.; iv) K<sub>2</sub>CO<sub>3</sub>, Bu<sub>4</sub>NBr, DMF, 120 °C; v) NBS, DCM, r.t.; vi) Pd<sub>2</sub>(dba)<sub>3</sub>, P(o-tolyl)<sub>3</sub>, chlorobenzene/DMF (10:1, v/v), 135 °C. b) The chemical structure of GA.

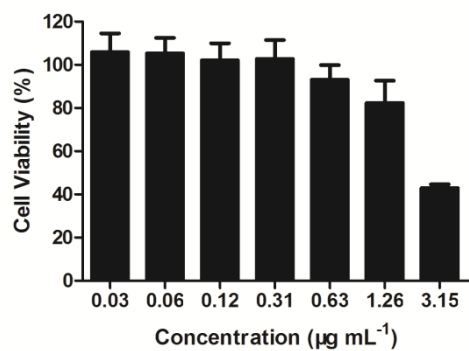

**Fig. S1** Viabilities of HepG2 cells treated with GA after incubation for 24 h at 37 °C.

All the results were repeated three times, and presented as mean  $\pm$  SD.

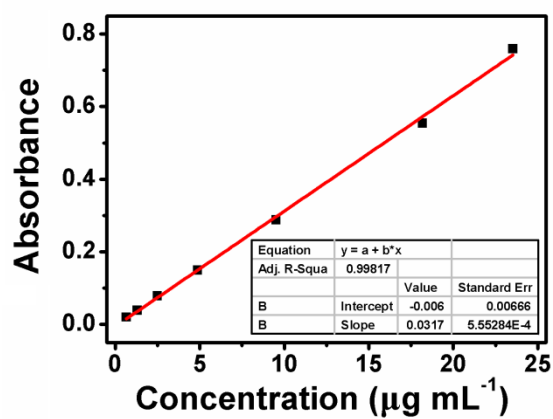

**Fig. S2** The standard curve of PDPP3T in THF.

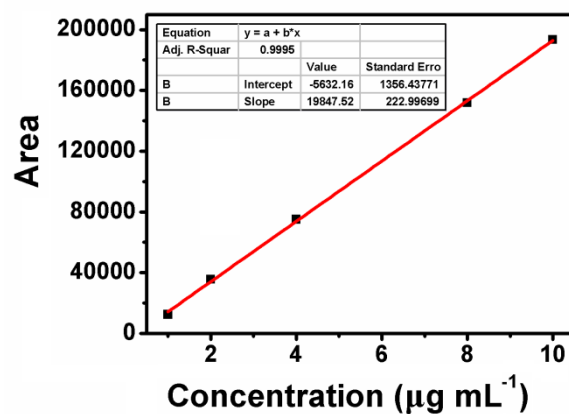

**Fig. S3** The standard curve of GA determined by HPLC.

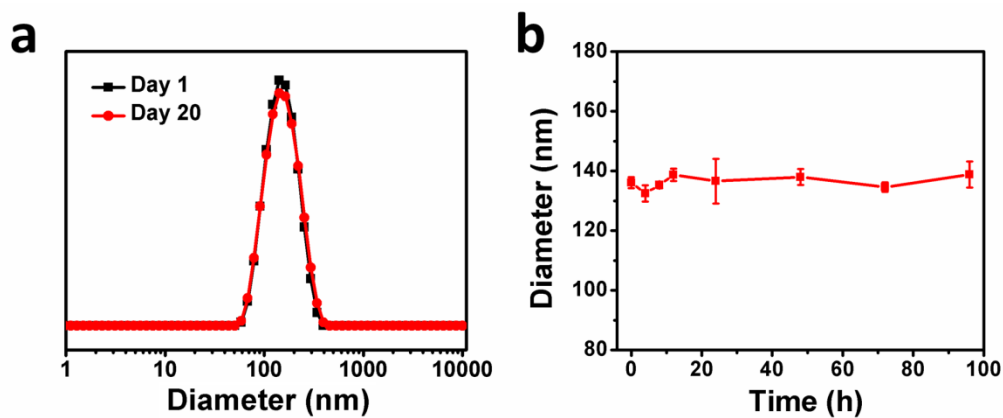

**Fig. S4** a) Size and size distribution of PGNPs at the 1st and the 20th day determined by DLS. b) Changes of the diameter of PGNPs in PBS (pH 7.4) containing 10% FBS as a function of time measured by DLS.

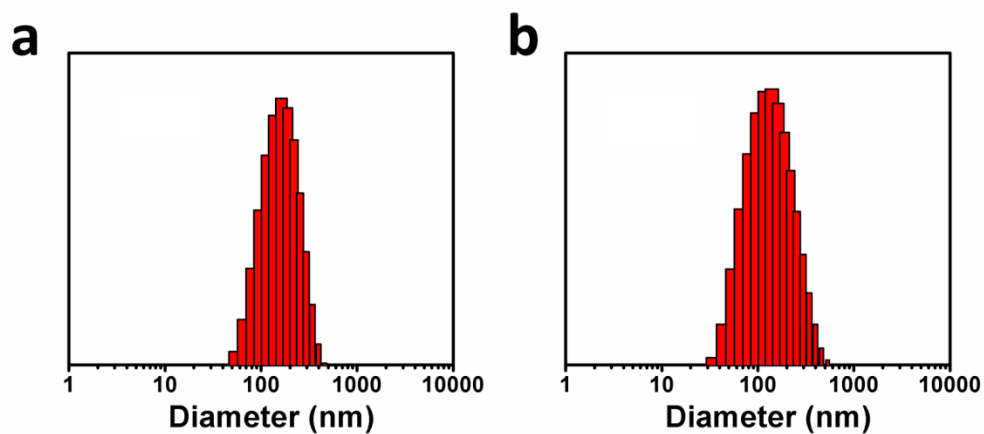

**Fig. S5** Size and size distribution of PNPs and GNPs determined by DLS.

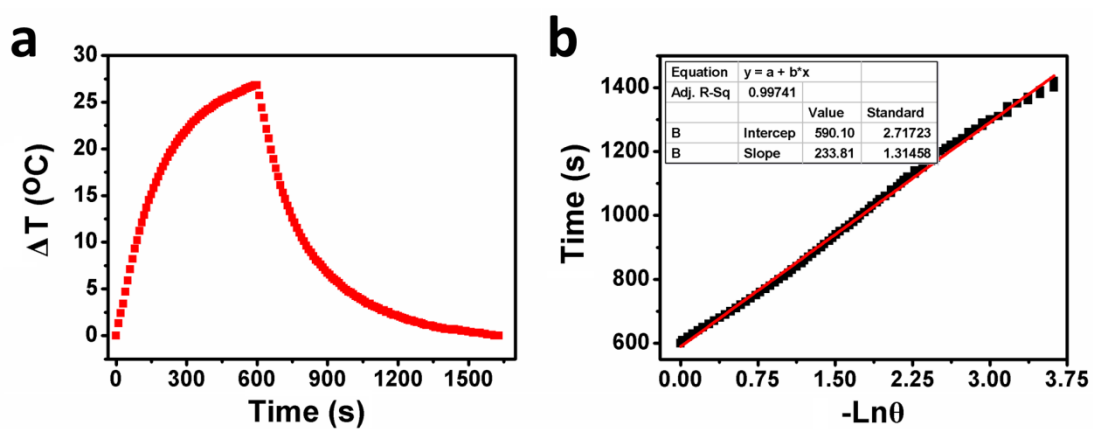

**Fig. S6** a) The photothermal response of PGNPs in water ( $5 \mu\text{g mL}^{-1}$ ) with laser irradiation (808 nm,  $1.0 \text{ W cm}^{-2}$ , 10 min) and then the laser was shut off. b) Linear time data versus  $-\ln \theta$  obtained from the cooling period of a).

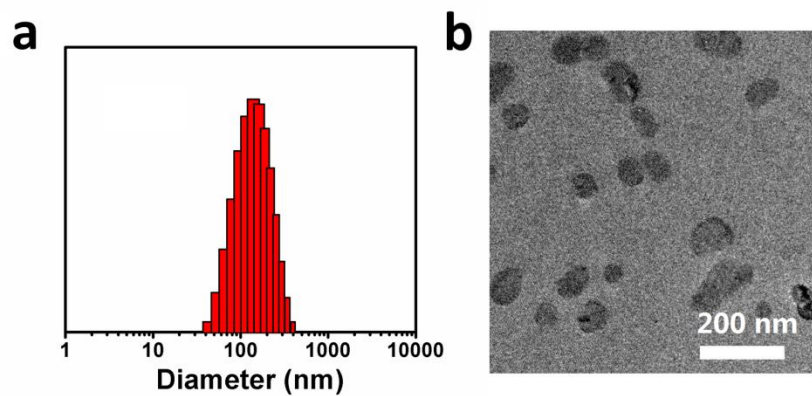

**Fig. S7** a) DLS result and b) TEM image of PGNPs after 6 cycles of heating-cooling.

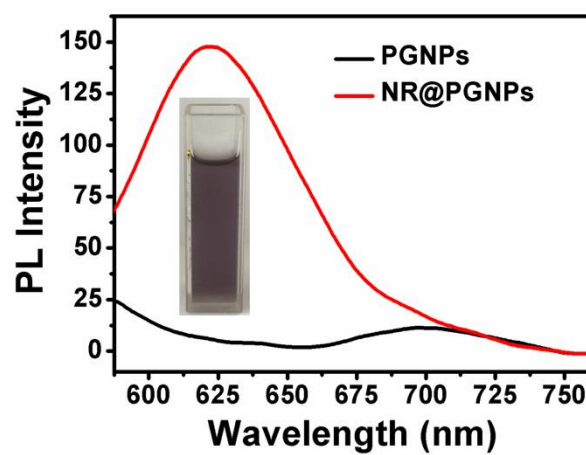

**Fig. S8** PL spectra of PGNPs and NR@PGNPs in water. Inset: the picture of NR@PGNPs in water.

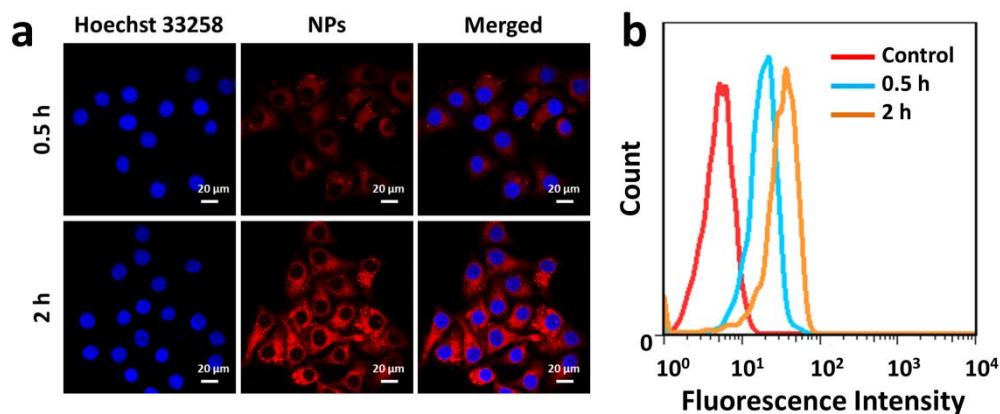

**Fig. S9** a) CLSM images of HepG2 cells incubated with NR@PGNPs at 37 °C for 0.5 and 2 h. Pictures correspond to the fluorescence of Hoechst 33258 (blue), NR@PGNPs (red) and merged images from left to right. b) FCM analysis of HepG2 cells incubated with NR@PGNPs at 37 °C for 0.5 and 2 h.

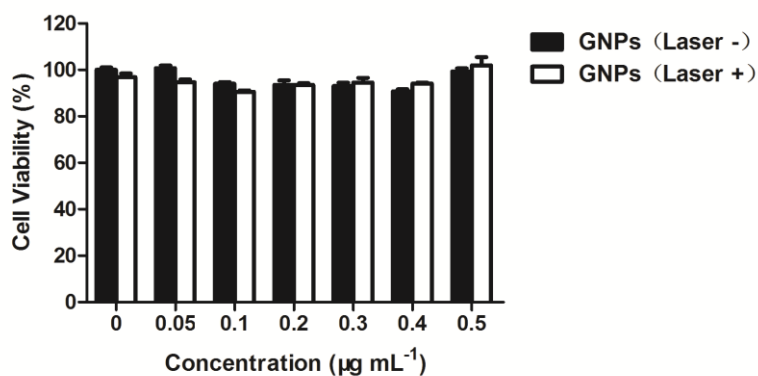

**Fig. S10** Cell viabilities of HepG2 cells treated with GNP with or without 808 nm laser irradiation (1.0 W cm<sup>-2</sup>, 10 min).



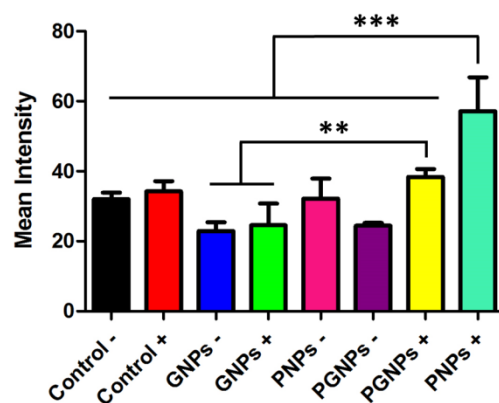

**Fig. S11** Mean intensity of immunofluorescence images for HSP90 1 h post treatment in HepG2 cells. The HepG2 cells were treated with PBS, GNPs, PNP and PGNPs under 808 nm laser irradiation ( $1.0 \text{ W cm}^{-2}$ , 10 min) or not.

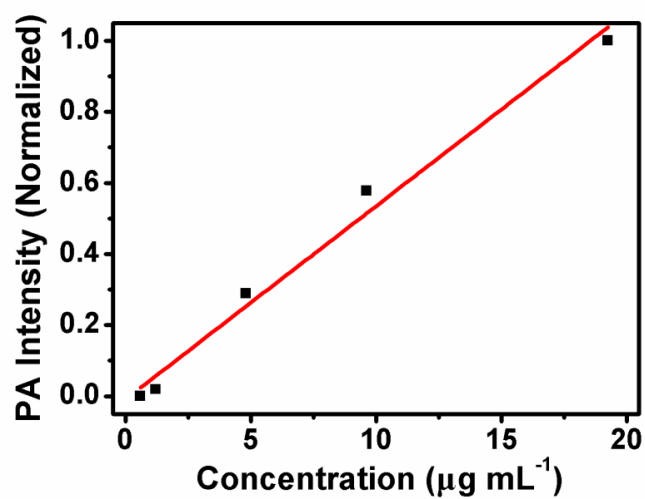

**Fig. S12** The intensity of PA signal as a function of concentrations of PGNPs.

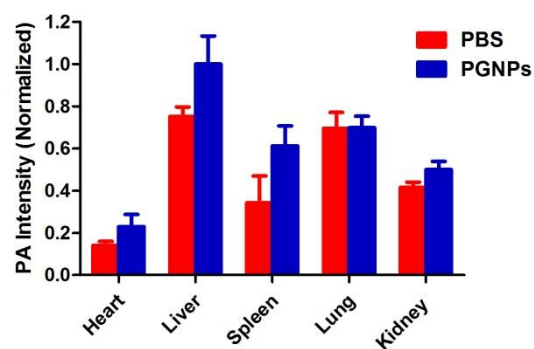

**Fig. S13** Ex vivo PA intensities of major organs (heart, liver, spleen, lung and kidney) of mice 24 h post injection.

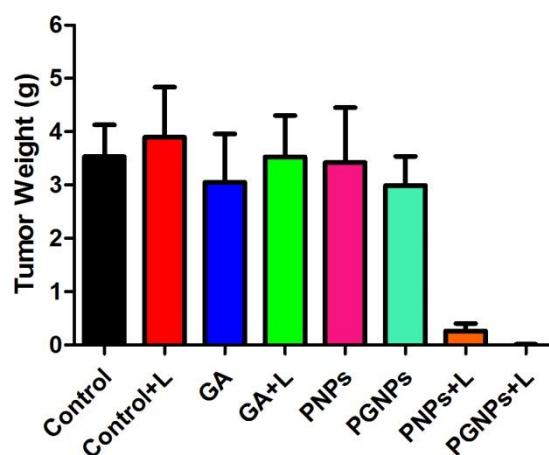

**Fig. S14** The tumor weights of mice after different treatments.

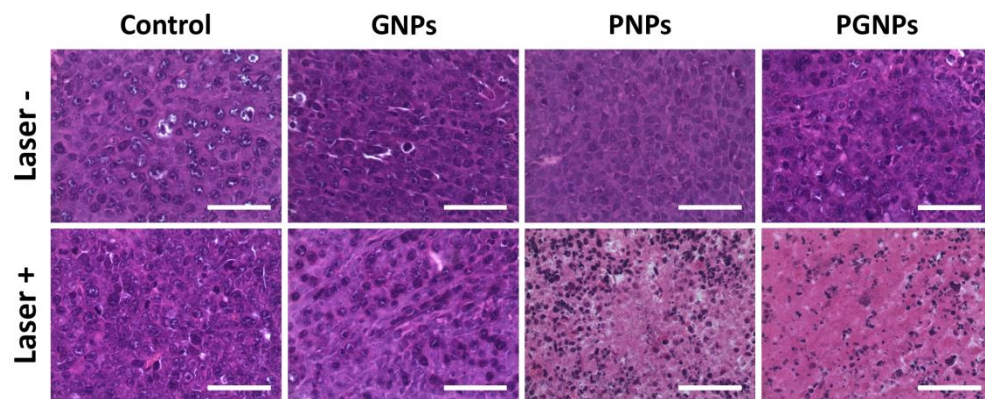

**Fig. S15** H&E stained tumor slices collected from mice 2 d post various treatments indicated. Scale bars: 200 μm.
